# Supplementary material for: Biochemical Composition and Biological Activities of Various Population of Brassica tournefortii Growing Wild in Tunisia
Source: MDPI journal article supplement (doi:10.3390/plants11233393), 2022-12-06
Supplement: s1 [file s1]

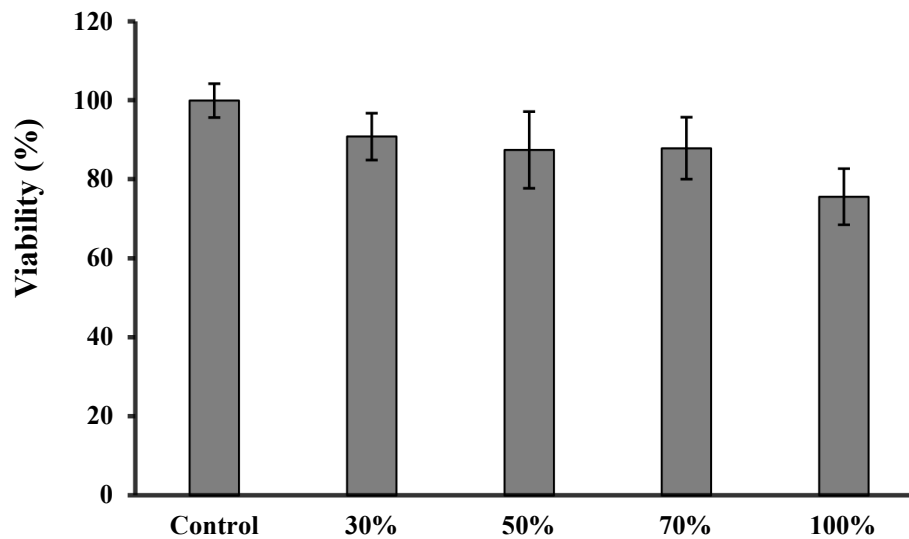

|       | Control     | 30%     | 50%       | 70%        | 100%      |
|-------|-------------|---------|-----------|------------|-----------|
| moy   | 100         | 90.8795 | 87.515723 | 87,9493334 | 75.660101 |
| ecart | 4.292790989 | 5.94133 | 9.7138925 | 7.83685243 | 7.1095741 |

**Figure S1. Cell viability in 70% ethanol.** MTT results showing the cell viability (%) for the K-562 cell line incubated with 70% ethanol compared to that one of the un-treated cells (control).

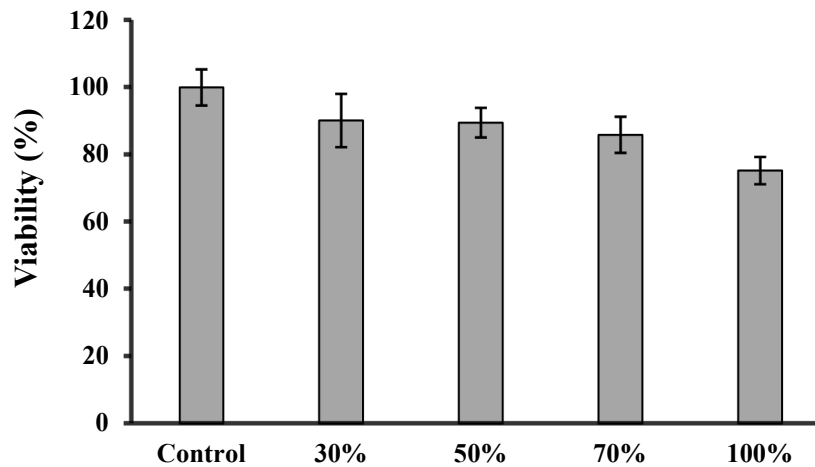

|       | Control     | 30%    | 50%       | 70%        | 100%      |
|-------|-------------|--------|-----------|------------|-----------|
| moy   | 100         | 90.167 | 89.534051 | 85.9165458 | 75.266838 |
| ecart | 5.379512647 | 7.9261 | 4.4082868 | 5.3616948  | 4.0648853 |

**Figure S2. Cell viability in 70% ethanol extract.** MTT results showing the cell viability (%) for the Caco-2 cell line incubated with 70% ethanol extract, compared to that one of the un-treated cells (control).
